# Supplementary material for: Preparation of Pt hollow nanotubes with adjustable diameters for methanol electrooxidation
Source: Royal Society of Chemistry journal article supplement (doi:10.1039/c4ra02568g), 2014-01-01
Supplement: c4ra02568g1.pdf [file c4ra02568g1.pdf]

## Supporting Information

### Preparation of Pt hollow nanotubes with adjustable diameters for methanol electrooxidation

Yao Xiao,<sup>abc</sup> Qing Lv,<sup>abc</sup> Jianbing Zhu,<sup>abc</sup> Shikui Yao,<sup>abc</sup> Changpeng Liu,<sup>\*b</sup> and  
Wei Xing <sup>\*a</sup>

<sup>a</sup>State Key Laboratory of Electroanalytical Chemistry, Changchun Institute of Applied Chemistry, Chinese Academy of Sciences, Changchun 130022, China. Fax: +86 431 85685653; Tel: +86 431 85262223; E-mail: [xingwei@ciac.jl.cn](mailto:xingwei@ciac.jl.cn)

<sup>b</sup>Laboratory of Advanced Power Sources, Changchun Institute of Applied Chemistry, Chinese Academy of Sciences, Changchun 130022, China.

<sup>c</sup>Graduate School of the Chinese Academy of Sciences, Beijing, 100039, China

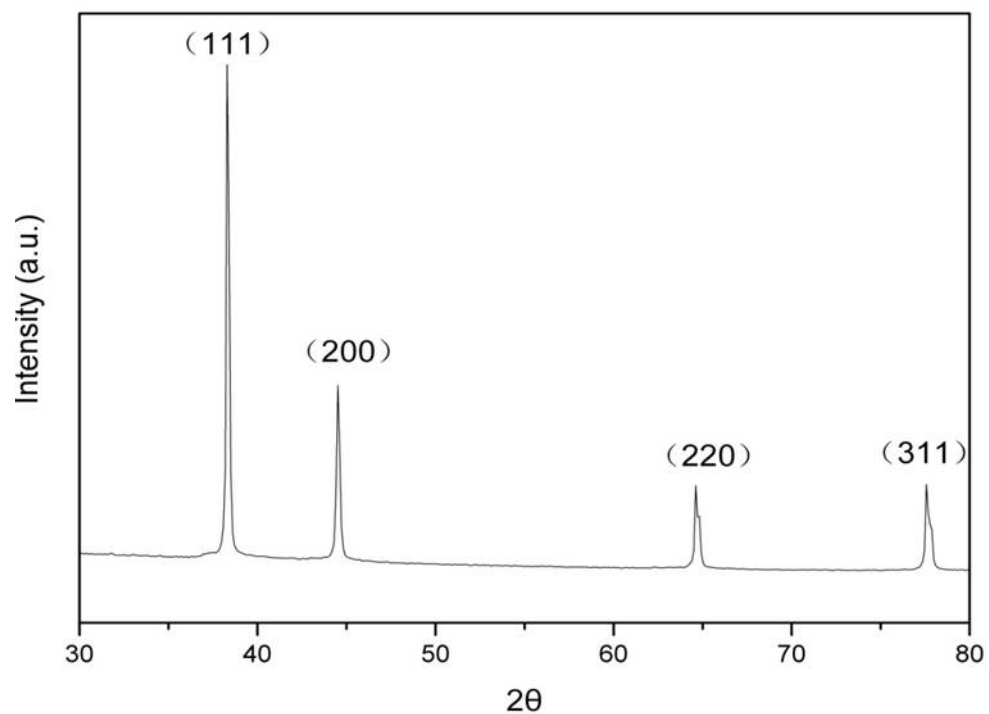

Fig. S1 XRD pattern of Ag nanowires with diameter of  $90 \pm 5$  nm.

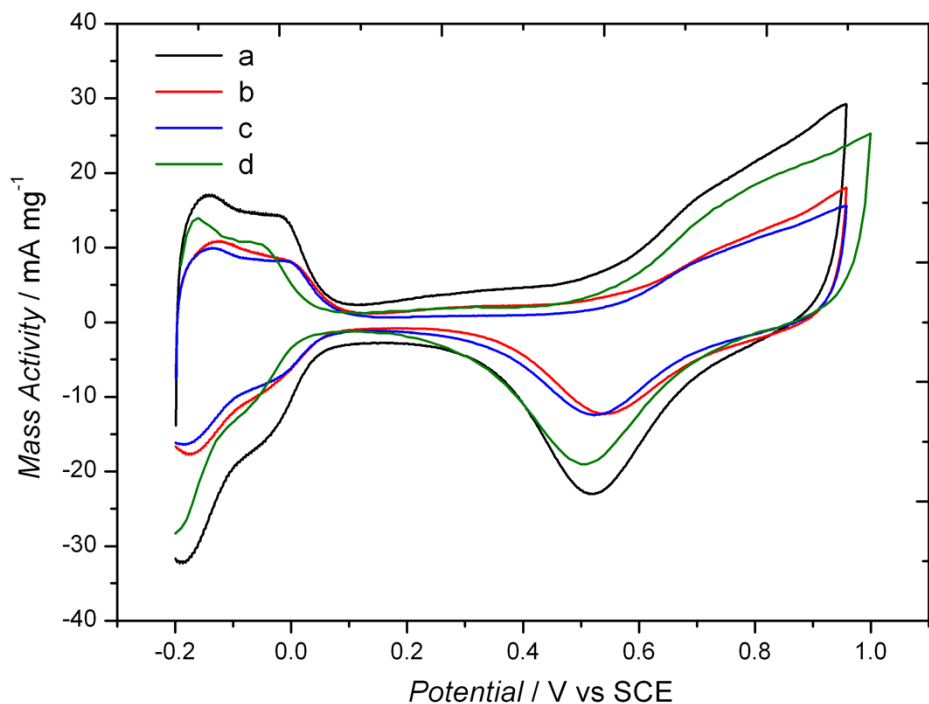

**Fig. S2** Cyclic voltammograms of (a) Pt-100, (b) Pt-350, (c) Pt-560, (d) Pt black catalysts in 0.5 M H<sub>2</sub>SO<sub>4</sub> supporting electrolyte.

| sample                                   | Pt -100 | Pt -350 | Pt -560 | Pt black |
|------------------------------------------|---------|---------|---------|----------|
| ECSA (cm <sup>2</sup> mg <sup>-1</sup> ) | 389.2   | 225     | 205.8   | 287.1    |
| peak potential (mV)                      | 516.9   | 575.0   | 575.2   | 507.7    |

**Table 1** Electrochemical surface area estimation from CO Stripping experiment and peak potential for CO stripping for the different catalysts

| sample                               | Pt -100 | Pt -350 | Pt -560 | Pt black |
|--------------------------------------|---------|---------|---------|----------|
| Mass Activity (mA mg <sup>-1</sup> ) | 403.0   | 219.5   | 199.6   | 250      |
| peak potential (mV)                  | 642.5   | 655.4   | 646.2   | 632.7    |

**Table 2** Mass activity and corresponding peak potential of for the different catalysts
